# Supplementary material for: ddRAD‐Seq reveals evolutionary insights into population differentiation and the cryptic phylogeography of Hyporhamphus intermedius in Mainland China
Source: PubMed Central journal article supplement (PMC9251877; doi:10.1002/ece3.9053), 2022-07-04

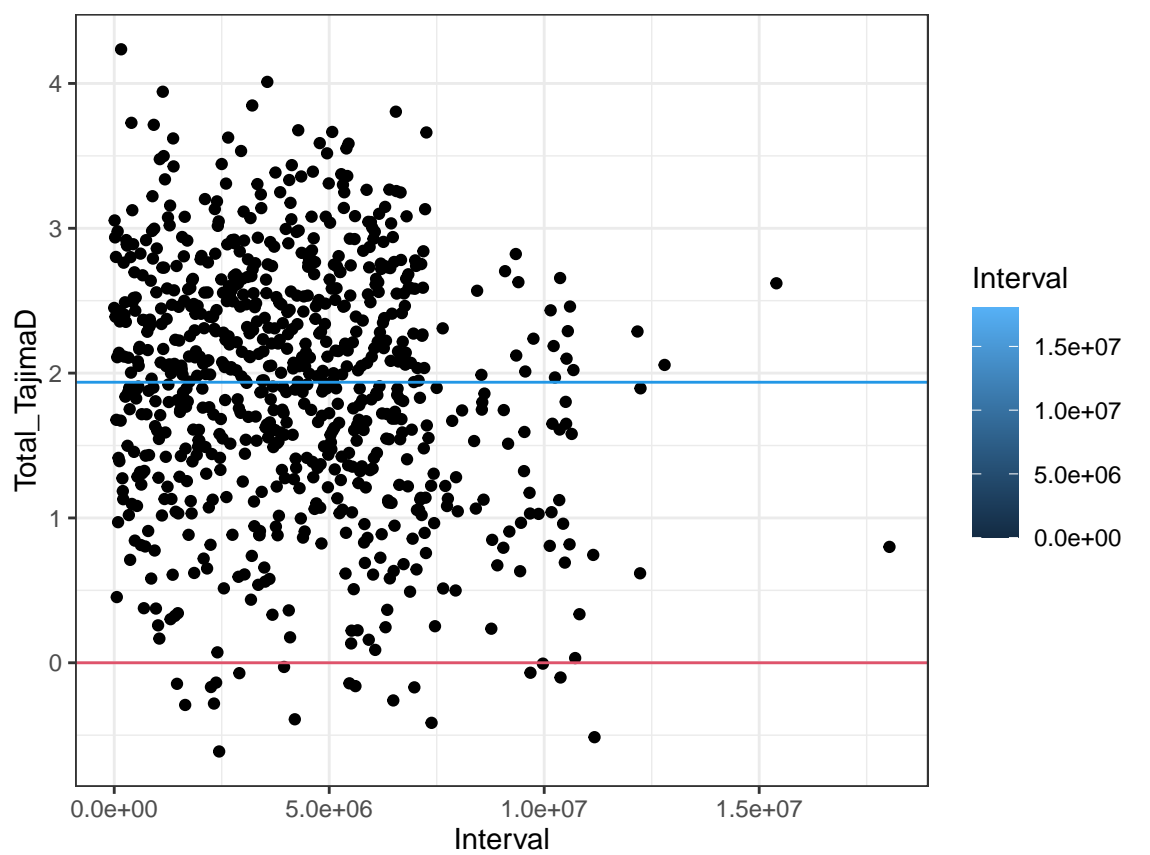

Supplement: ECE3-12-e9053-s001.pdf [file ECE3-12-e9053-s001.pdf]
